# Supplementary material for: Post-polio syndrome is not a dysimmune condition
Source: PubMed Central journal article supplement — Eur J Phys Rehabil Med. 2024 Jan 22;60(2):270–9. doi: 10.23736/S1973-9087.23.08158-3 (PMC11112507; doi:10.23736/s1973-9087.23.08158-3), 2024-01-22
Supplement: Supplementary_Digital_Material1.pdf [file Supplementary_Digital_Material1.pdf]

SUPPLEMENTARY DIGITAL MATERIAL 1

Supplementary Table I.—Lymphocytes levels in patients with post-poliomyelitis syndrome (PPS) and controls.

| Variable                            | PPS patients (N.=47) | Controls (N.=27)  | P value |
|-------------------------------------|----------------------|-------------------|---------|
| T lymphocytes (%)                   | 72 (64; 78)          | 68 (63; 78)       | 0.66    |
| T lymphocytes (N/mm <sup>3</sup> )  | 1294 (892; 1848)     | 1481 (1148; 1739) | 0.46    |
| Th1 cells (%)                       | 35 (29; 43)          | 35 (31; 38)       | 0.43    |
| Th1 cells (N/mm <sup>3</sup> )      | 403 (257; 558)       | 365 (274; 622)    | 0.88    |
| Th2 cells (%)                       | 11 (9; 14)           | 13 (10; 15)       | 0.32    |
| Th2 cells (N/mm <sup>3</sup> )      | 123 (98; 168)        | 130 (99; 200)     | 0.44    |
| Th17 cells (%)                      | 16 (13; 20)          | 17 (12; 20)       | 0.98    |
| Th17 cells (N/mm <sup>3</sup> )     | 172 (112; 250)       | 182 (121; 249)    | 0.86    |
| T regulatory (%)                    | 7 (6; 9)             | 7 (6; 8)          | 0.45    |
| T regulatory (N/mm <sup>3</sup> )   | 66 (49; 83)          | 65 (47; 86)       | 0.89    |
| B lymphocytes (%)                   | 15 (13; 20)          | 15 (12; 18)       | 0.87    |
| B lymphocytes (N/mm <sup>3</sup> )  | 283 (200; 384)       | 308 (212; 473)    | 0.26    |
| NK lymphocytes (%)                  | 13 (8; 18)           | 14 (10; 19)       | 0.61    |
| NK lymphocytes (N/mm <sup>3</sup> ) | 225 (140; 327)       | 309 (147; 380)    | 0.20    |

Values are medians (interquartile range). Alpha risk: 0.002.
