# Supplementary material for: Post-polio syndrome is not a dysimmune condition
Source: PubMed Central journal article supplement — Eur J Phys Rehabil Med. 2024 Jan 22;60(2):270–9. doi: 10.23736/S1973-9087.23.08158-3 (PMC11112507; doi:10.23736/s1973-9087.23.08158-3), 2024-01-22
Supplement: Supplementary_Digital_Material2.pdf [file Supplementary_Digital_Material2.pdf]

SUPPLEMENTARY DIGITAL MATERIAL 2

Supplementary Table S2: II.—Cytokines levels in patients with post-poliomyelitis syndrome (PPS) and controls.

| Variable       | PPS patients (N.=47)    | Controls (N.=27)        | P value |
|----------------|-------------------------|-------------------------|---------|
| GM-CSF         | 0.20 (0.06; 0.28)       | 0.16 (0.05; 0.28)       | 0.52    |
| IFN- $\gamma$  | 294 (11; 47)            | 27 (2; 48)              | 0.69    |
| IL-1 $\beta$   | 0.65 (0.37; 1.16)       | 0.72 (0.27; 1.28)       | 0.89    |
| IL-4           | 0.30 (0.23; 0.38)       | 0.29 (0.19; 0.43)       | 0.88    |
| IL-6           | 0.48 (0.08; 1.41)       | 0.53 (0.31; 1.62)       | 0.42    |
| IL-8           | 8.1 (6.1; 12.3)         | 7.5 (5.0; 14.3)         | 0.36    |
| IL-10          | 0.32 (0.14; 0.56)       | 0.29 (0.06; 0.61)       | 0.71    |
| IL-13          | 2.9 (1.7; 8.6)          | 1.7 (1.7; 9.2)          | 0.40    |
| IL-17          | 1.7 (0.02; 4.1)         | 1.5 (0.02; 3.7)         | 0.72    |
| IL-21          | 5.5 (1.3; 12.9)         | 3.7 (0.3; 22.8)         | 0.69    |
| IL-22          | 0.9 (0.3; 1.9)          | 0.7 (0.3; 1.2)          | 0.51    |
| IL-23          | 6.9 (4.7; 10.5)         | 8.1 (5.7; 12.1)         | 0.31    |
| TGF- $\beta$ 1 | 4252 (2867; 5869)       | 3919 (3192; 5269)       | 0.87    |
| MIP-3a         | 49 (26; 88)             | 57 (35; 190)            | 0.13    |
| MCP-1          | 240 (159; 289)          | 203 (144; 226)          | 0.02    |
| TNF- $\alpha$  | 1.4 (0.6; 1.9)          | 1.2 (0.4; 2.8)          | 0.62    |
| RANTES         | 40,654 (28,043; 65,985) | 46,372 (29,599; 65,748) | 0.38    |

All values are expressed in pg/mL as medians (interquartile range). Alpha risk: 0.002.
