# Supplementary material for: Post-polio syndrome is not a dysimmune condition
Source: PubMed Central journal article supplement — Eur J Phys Rehabil Med. 2024 Jan 22;60(2):270–9. doi: 10.23736/S1973-9087.23.08158-3 (PMC11112507; doi:10.23736/s1973-9087.23.08158-3), 2024-01-22
Supplement: Supplementary_Digital_Material3.pdf [file Supplementary_Digital_Material3.pdf]

SUPPLEMENTARY DIGITAL MATERIAL 3

Supplementary Table III.—Blood count and serum electrolytes in patients whose late main symptoms were pain or fatigue as compared with other PPS patients.

| Variable                            | PPS patients with pain or fatigue as main late symptoms (N.=20) | Other PPS patients (N.=27) | P value |
|-------------------------------------|-----------------------------------------------------------------|----------------------------|---------|
| Hemoglobin (g/dL)                   | 14.1 (13.5; 15.7)                                               | 14.6 (13.9; 15.1)          | 0.43    |
| MCV (fl)                            | 92 (90; 95)                                                     | 92 (89; 96)                | 0.73    |
| Platelet count (10 <sup>9</sup> /L) | 267 (218; 312)                                                  | 241 (194; 270)             | 0.19    |
| Leucocytes (10 <sup>9</sup> /L)     | 6.35 (5.77; 6.96)                                               | 6.60 (5.48; 7.17)          | 0.96    |
| Neutrophils (%)                     | 58 (52; 67)                                                     | 59 (46; 63)                | 0.29    |
| Eosinophils (%)                     | 3 (2; 5)                                                        | 4 (3; 5)                   | 0.62    |
| Basophils (%)                       | 1.0 (1.0; 1.0)                                                  | 1.0 (1.0; 1.0)             | 0.83    |
| Lymphocytes (%)                     | 29 (26; 43)                                                     | 28 (25; 35)                | 0.10    |
| Monocytes (%)                       | 7 (5; 8)                                                        | 8 (7; 9)                   | 0.04    |
| CRP (mg/L)                          | 2.1 (0.9; 3.9)                                                  | 1.9 (0.9; 3.0)             | 0.68    |
| CPK (UI/LI)                         | 102 (68; 288)                                                   | 153 (89; 194)              | 0.39    |

MCV: mean corpuscular volume; CRP: C-reactive protein; CPK: creatine phospho kinase. Values are medians (interquartile range).

Supplementary Table IV.—Cytokines levels in patients whose late main symptoms were pain or fatigue as compared with other PPS patients.

| Variable       | PPS patients with pain or fatigue as main late symptoms (N.=20) | Other PPS patients (N.=27) | P value |
|----------------|-----------------------------------------------------------------|----------------------------|---------|
| GM-CSF         | 0.19 (0.03; 0.28)                                               | 0.21 (0.09; 0.30)          | 0.67    |
| IFN- $\gamma$  | 25 (8; 37)                                                      | 32 (117; 50)               | 0.25    |
| IL-1 $\beta$   | 0.58 (0.32; 1.19)                                               | 0.72 (0.39; 1.12)          | 0.63    |
| IL-4           | 0.25 (0.19; 0.31)                                               | 0.34 (0.25; 0.44)          | 0.009   |
| IL-6           | 0.24 (0.03; 1.04)                                               | 0.74 (0.31; 1.50)          | 0.11    |
| IL-8           | 6.6 (5.7; 10.3)                                                 | 8.8 (7.4; 13.2)            | 0.10    |
| IL-10          | 0.29 (0.23; 0.55)                                               | 0.37 (0.11; 0.56)          | 0.80    |
| IL-13          | 3.8 (1.7; 9.8)                                                  | 1.8 (1.7; 8.6)             | 0.69    |
| IL-17          | 1.0 (0.02; 3.9)                                                 | 2.1 (0.02; 4.3)            | 0.54    |
| IL-21          | 4.4 (1.3; 8.0)                                                  | 8.2 (1.3; 26.8)            | 0.20    |
| IL-22          | 0.8 (0.5; 3.2)                                                  | 0.9 (0.3; 1.3)             | 0.15    |
| IL-23          | 6.9 (5.8; 12.4)                                                 | 6.9 (4.1; 10.5)            | 0.50    |
| TGF- $\beta$ 1 | 4270 (2902; 5370)                                               | 39,771 (2734; 7098)        | 0.60    |
| MIP-3a         | 55 (31; 77)                                                     | 49 (23; 94)                | 0.84    |
| MCP-1          | 263 (157; 314)                                                  | 222 (188; 269)             | 0.53    |
| TNF- $\alpha$  | 0.9 (0.4; 1.8)                                                  | 1.5 (0.9; 1.9)             | 0.18    |
| RANTES         | 41,639 (29,044; 61,167)                                         | 40,461 (26,619; 70,845)    | 0.96    |

All values are expressed in pg/mL as medians (interquartile range).
